# Supplementary material for: Lipopolysaccharide is Inserted into the Outer Membrane through An Intramembrane Hole, A Lumen Gate, and the Lateral Opening of LptD
Source: PubMed Central journal article supplement (PMC4353691; doi:10.1016/j.str.2015.01.001), 2015-03-03
Supplement: mmc1.pdf [file mmc1.pdf]

**Structure, Volume 23**

**Supplemental Information**

**Lipopolysaccharide is Inserted into the  
Outer Membrane through An Intramembrane Hole,  
A Lumen Gate, and the Lateral Opening of LptD**

**Yinghong Gu, Phillip J. Stansfeld, Yi Zeng, Haohao Dong, Wenjian Wang, and  
Changjiang Dong**

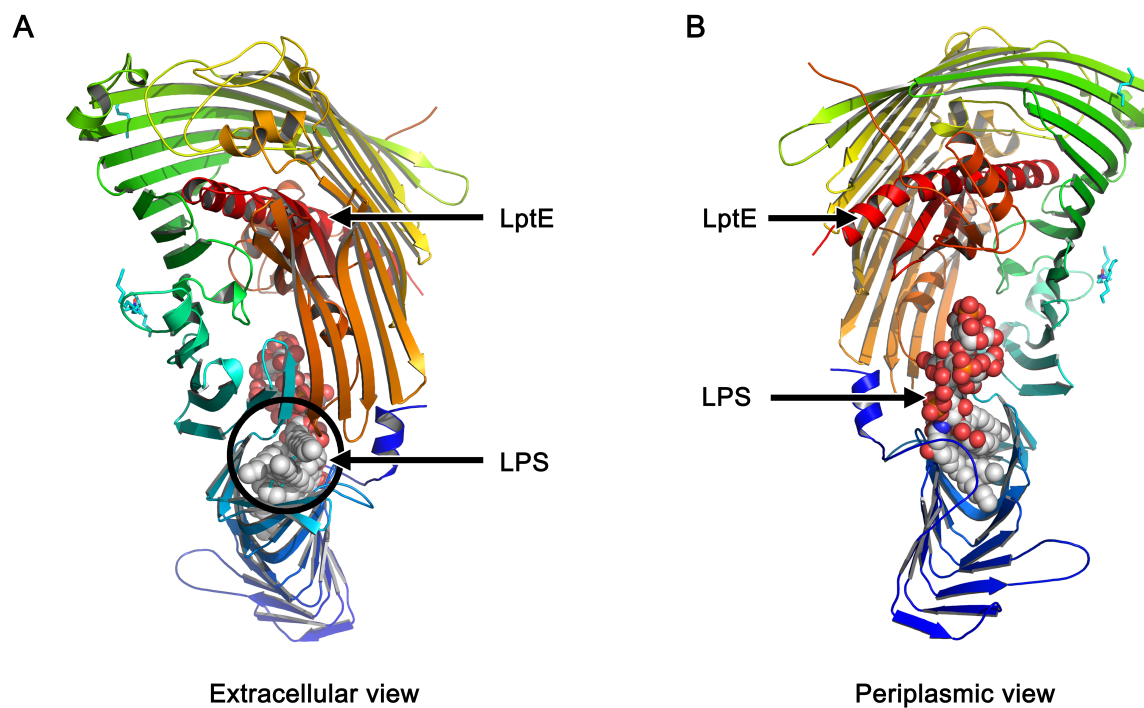

**Figure S1, related to Figure 1. LPS molecule is modeled into the LptD/E complex.** The modeling is based on the positions of detergent molecules LDAO and C8E4 in the N-terminal domain of LptD. (A) The extracellular view of the LptD/E complex with LPS. The acyl tails of the LPS are pointing to the intramembrane hole, which is shown in a dark circle. (B) The periplasmic view of the LptD/E complex with LPS. The hydrophobic portion of LPS is located in the hydrophobic core of the N-terminal domain, while the rest of portions of LPS are stretched out for entering the barrel. The LptE may assist core oligosaccharide and O-antigen transport within the barrel.

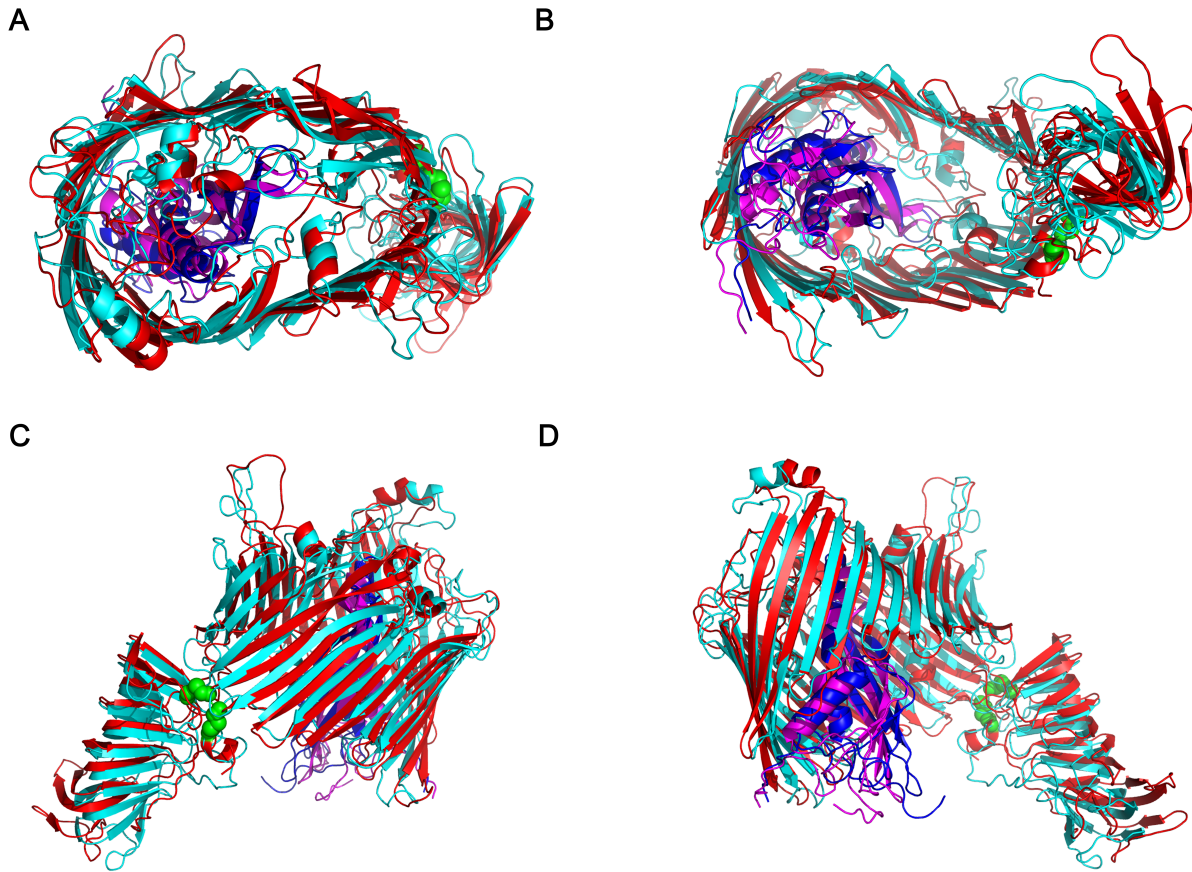

**Figure S2, related to Figure 2. Comparison of conformational changes of the oxidized and reduced LptD/E after 100s molecular dynamics simulations at 350K.** The oxidized LptD/E are in red and magenta, while the reduced LptD/E are in cyan and blue, respectively. The two disulfide bonds are shown in green. (A) The extracellular view of the LptD/E complex. Strands  $\beta$ 25,  $\beta$ 26 and their extracellular loop of the reduced LptD/E are sealed the pore, which is shown in a black dotted circle. (B) The periplasmic view of the LptD/E complex. The different conformational changes between the reduced and oxidized LptD/E at the N-terminal strands, shown in a black dotted circle. (C). A side view of the LptD/E complex. The conformational changes between the reduced and oxidized forms of LptD/E around the disulfide bonds, shown in a black dotted circle. The N-terminal helix in the reduced form of LptD/E become a loop. (D) Another side view of the LptD/E complex. The LptE in the oxidized form moves toward one side of the lumen, which makes the barrel widely open for LPS translocation, shown in a black dotted line. The Fig. C rotates 180 degree along y-axis to become Fig. D.

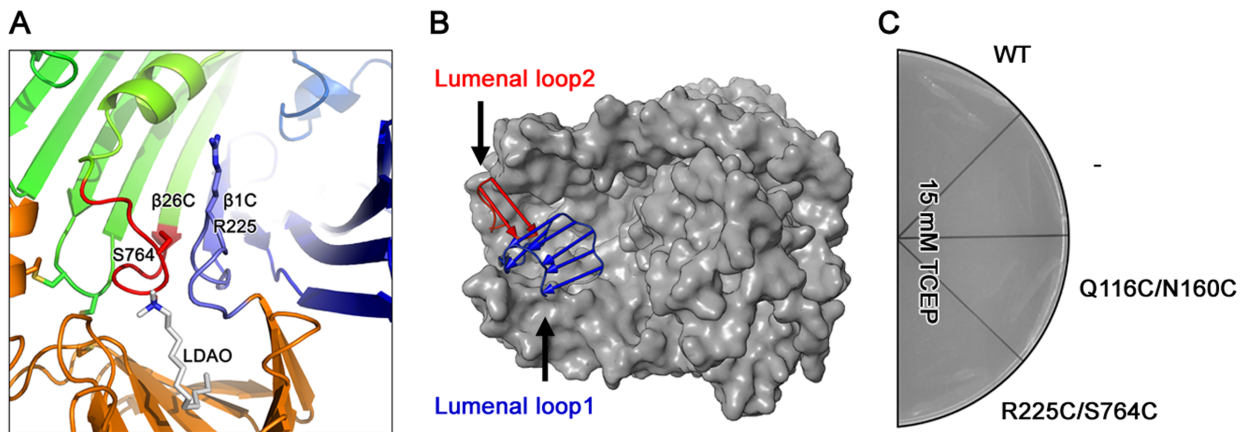

**Figure S3, related to Figure 3. The lumen gate of LptD, and The *E. coli* cells with the LptD wild type and cysteine mutants Q116C/N160C and R225C/S764C are killed or inhibited by 15 mM TCEP. (A)** The lumen gate are two loops in blue and red. There is a LDAO molecule, LPS's mimetics, in front of the lumen gate. Residues S764 and R225 are shown in stick. **(B)** The switch of the lumen gate. The arrows show the lumen gate from an open position to a closed position, which is based on the LptD/E structures of *S. typhimurium* LT2 and *S. flexneri*. **(C)** The TCEP at 15 mM may break the disulfide bond between C173 and C727, which is in the membrane and essential for the vitality of *E. coli*.

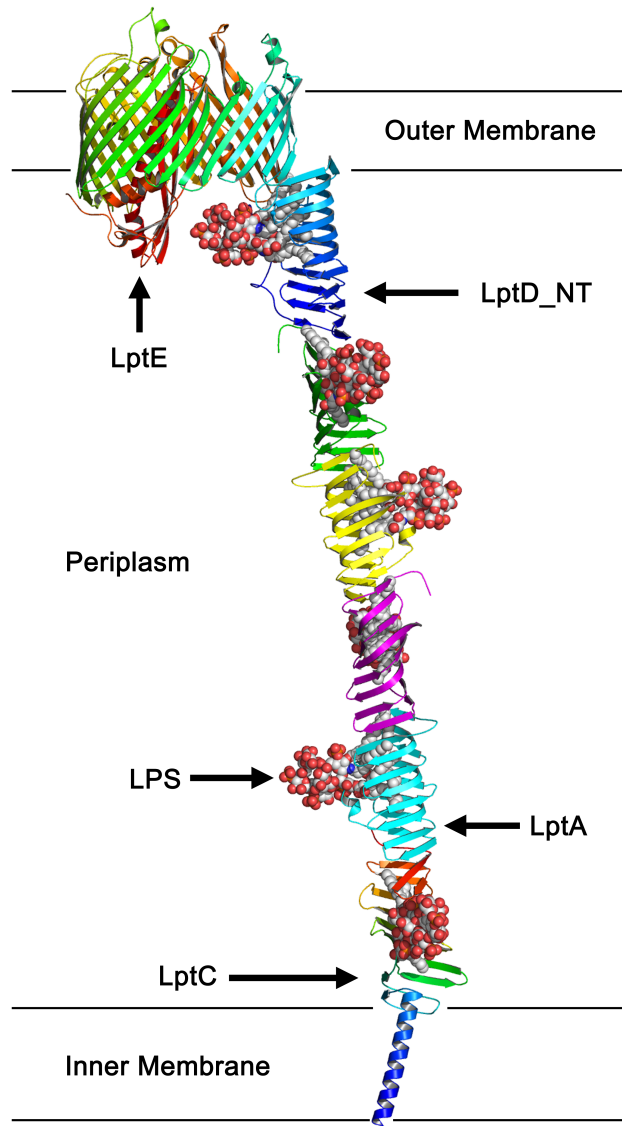

**Figure S4**, related to Figure 4. **The LPS transport slide formed by LptC, LptA and LptDE across the periplasm.** The slide contains one LptC, four LptA and one LptD molecule(s). The slide rotates  $\sim 360^\circ$  from the LptC to LptD. The LPS molecules are modeled in the slide to show the rotation of the slide.

**Video S1**, related to Figure 2. **The molecular dynamics simulation of oxidized LptD/E complex.** The  $\beta 1C$  in red and  $\beta 26C$  in green. The hydrophobic residues in the intramembrane hole are in blue.
